# Supplementary material for: How the COVID-19 Pandemic Affects Risk Awareness in Dentists: A Scoping Review
Source: MDPI journal article supplement (doi:10.3390/ijerph19094971), 2022-04-20
Supplement: s1 [file s1]

Table S1: Studies excluded after full-text review

| Author             | Reason of exclusion                 |
|--------------------|-------------------------------------|
| Ahmed et al.       | Data didn't meet inclusion criteria |
| Alkhalifah et al.  | Data didn't meet inclusion criteria |
| Aly and Elchaghaby | Data didn't meet inclusion criteria |
| Anushya et al.     | Data didn't meet inclusion criteria |
| Atas et al.        | Data didn't meet inclusion criteria |
| Celik et al.       | Data didn't meet inclusion criteria |
| Consolo et al.     | Data didn't meet inclusion criteria |
| Haider et al.      | Data didn't meet inclusion criteria |
| Javed et al.       | Data didn't meet inclusion criteria |
| Kochhar et al.     | Data didn't meet inclusion criteria |
| Kumar et al.       | Data didn't meet inclusion criteria |
| Noushi et al.      | Data didn't meet inclusion criteria |
| Novae et al.       | Data didn't meet inclusion criteria |
| Pai et al.         | Data didn't meet inclusion criteria |
| Plaza-Ruiz et al.  | Data didn't meet inclusion criteria |
| Quadri et al.      | Data didn't meet inclusion criteria |
| Reddy et al.       | Data didn't meet inclusion criteria |
| Salgarello et al.  | Data didn't meet inclusion criteria |
| Sarfaraz et al.    | Data didn't meet inclusion criteria |
| Sarialioglu et al. | Data didn't meet inclusion criteria |
| Silvestre et al.   | Data didn't meet inclusion criteria |
| Ugrappa et al.     | Data didn't meet inclusion criteria |
