# Supplementary material for: How the COVID-19 Pandemic Affects Risk Awareness in Dentists: A Scoping Review
Source: MDPI journal article supplement (doi:10.3390/ijerph19094971), 2022-04-20
Supplement: s1 [file s1]

Table S2: Studies excluded after data extraction

| Author               | Reason of exclusion                                |
|----------------------|----------------------------------------------------|
| Ahmad et al.         | Extracted data couldn't be included in the results |
| Aravind et al.       | Extracted data couldn't be included in the results |
| Gambhir et al.       | Extracted data couldn't be included in the results |
| Jafari et al.        | Extracted data couldn't be included in the results |
| Jose et al.          | Extracted data couldn't be included in the results |
| Jungo et al.         | Extracted data couldn't be included in the results |
| Khanal et al.        | Extracted data couldn't be included in the results |
| Martina et al.       | Extracted data couldn't be included in the results |
| Maru et al.          | Extracted data couldn't be included in the results |
| Sanchez-Perez et al. | Extracted data couldn't be included in the results |
| Shacham et al.       | Extracted data couldn't be included in the results |
| Shubayr et al.       | Extracted data couldn't be included in the results |
| Singh et al.         | Extracted data couldn't be included in the results |
